# Supplementary material for: Differential Effects of Empagliflozin on Microvascular Complications in Murine Models of Type 1 and Type 2 Diabetes
Source: PubMed Central journal article supplement (PMC7690408; doi:10.3390/biology9110347), 2020-10-22
Supplement: biology-09-00347-s001.pdf [file biology-09-00347-s001.pdf]

# Supplementary Figure 1

**A**

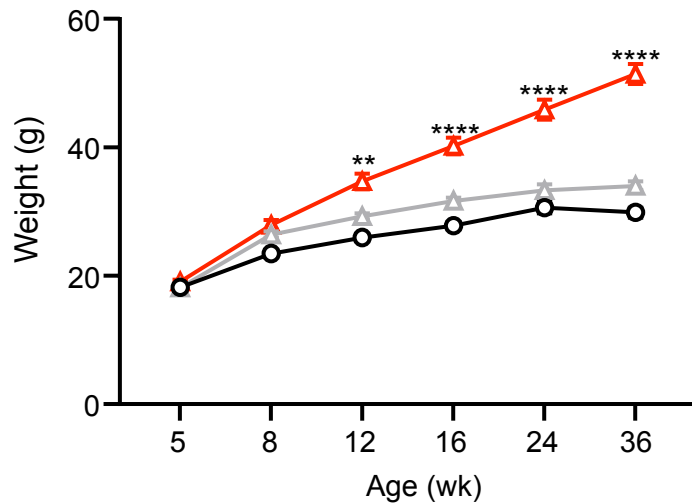

**B**

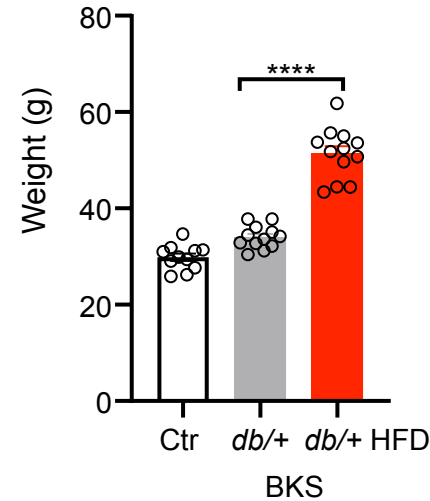

**C**

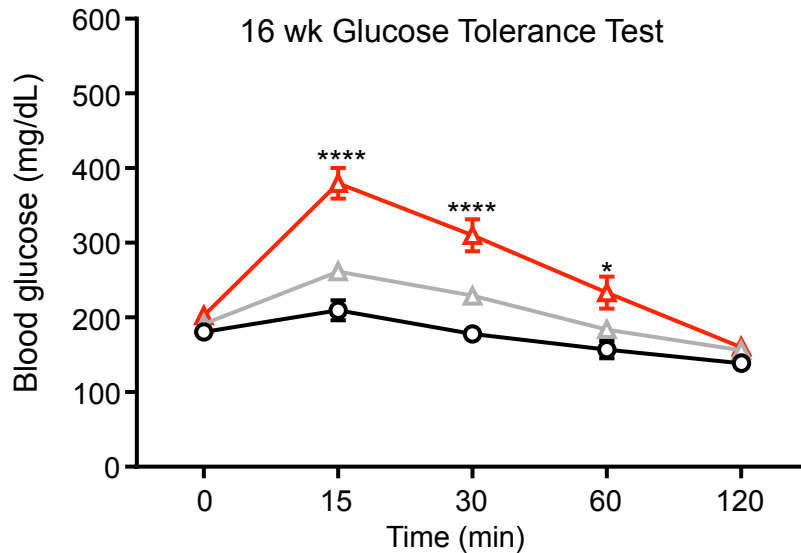

**D**

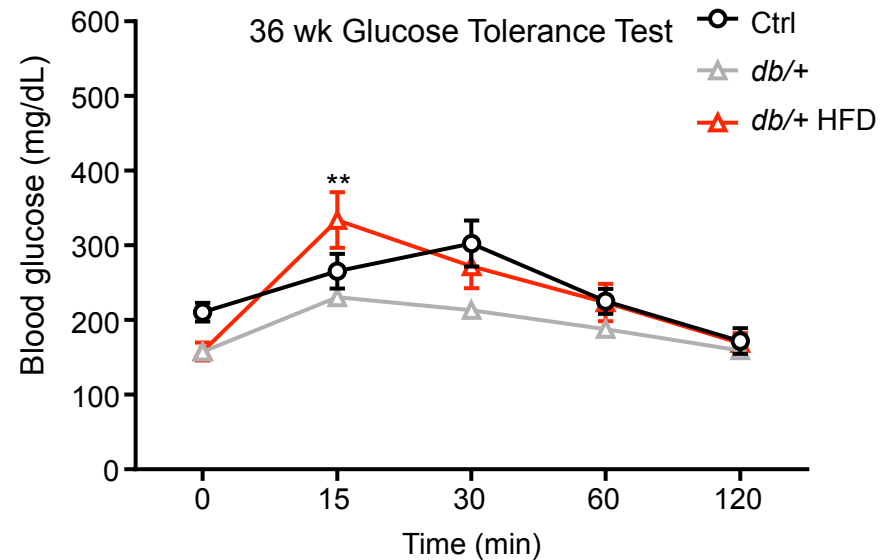

**Supplementary Fig. 1. *db/+* mice fed a HFD gain weight and display impaired glucose tolerance.** (A-D) Longitudinal body weight measurement (A), terminal body weight measurement (B), glucose tolerance test at 16 weeks (C), and at 36 weeks (D) in *db/+* mice placed on HFD (*db/+* HFD), control (*db/+*) and WT control (Ctr) mice; n = 11-12 mice per group; \*P < 0.05, \*\*P < 0.01, \*\*\*P < 0.001, \*\*\*\*P < 0.0001 vs. *db/+*; by one-way ANOVA. Data are expressed as the mean ± s.e.m.
